# Supplementary material for: Sintering Copper Nanoparticles with Photonic Additive for Printed Conductive Patterns by Intense Pulsed Light
Source: MDPI journal article supplement (doi:10.3390/nano9081071), 2019-07-25
Supplement: s1 [file s1]

Supporting Information for:

# Sintering Copper nanoparticles with photonic additive for printed conductive patterns by intense pulsed light

*Wan-Yu Chung<sup>1</sup>, Yi-Chin Lai<sup>1</sup>, Tetsu Yonezawa<sup>2,\*</sup>, Ying-Chih Liao<sup>1,\*</sup>*

<sup>1</sup> Department of Chemical Engineering, National Taiwan University, Taipei, Taiwan

<sup>2</sup> Division of Materials Science and Engineering, Hokkaido University, Sapporo,  
Hokkaido, Japan

Contents:

1. Thermogravimetric analysis of PVP.
2. UV-vis absorbance spectrum comparison of various composition.
3. SEM images of sintered Cu/CuO film with different sintering intensity.

**Figure S1**

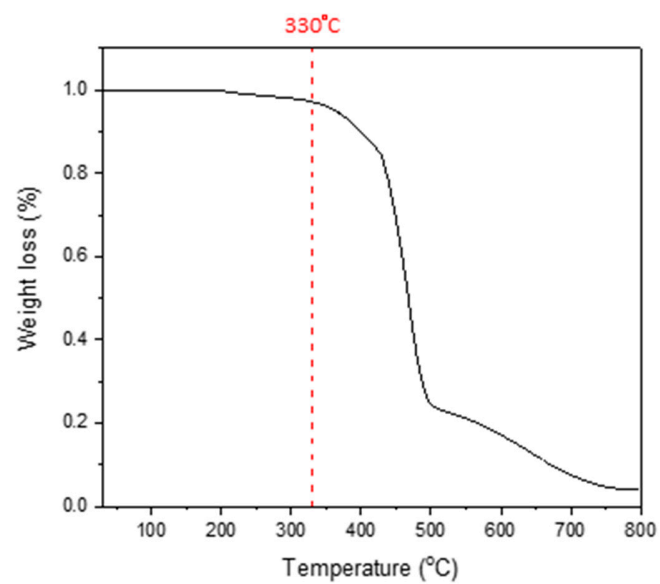

Figure S1 Thermogravimetric analysis of PVP.

**Figure S2**

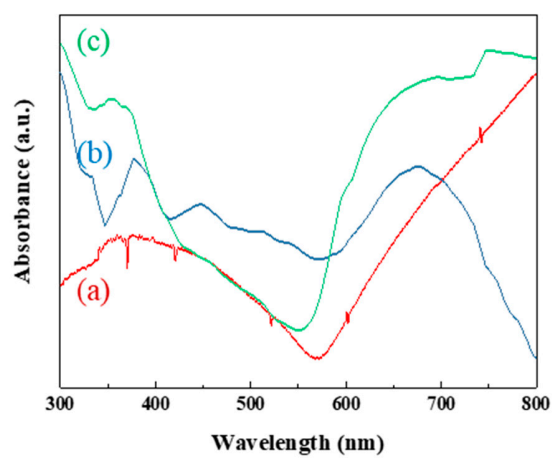

**Figure S2.** UV-vis absorbance spectrum comparison of (a) CuNP, (b) CuONPs and (c) CuONP/CuNP mixture with a weight ratio of 1/80.

**Figure S3**

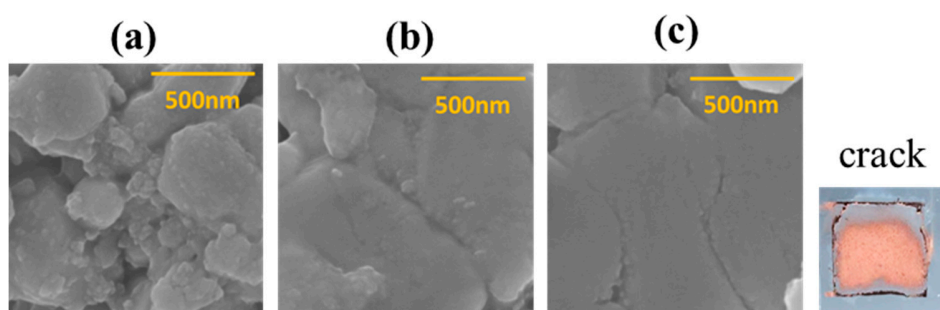

**Figure S3.** SEM images of sintered Cu/CuO film with sintering intensity at (a) 2.36J/cm<sup>2</sup>, (b) 3.08 J/cm<sup>2</sup> and (c) 3.23 J/cm<sup>2</sup>.
